# Supplementary material for: Convergent Evidence for the Validity of a Performance-Based ICT Skills Test
Source: Atypon-hosted journal article supplement (doi:10.1027/1015-5759/a000507), 2019-04-05
Supplement: 1015-5759_a000507_esm2.pdf [file 1015-5759_a000507_esm2.pdf]

R version 3.4.3 (2017-11-30)

```
library(lme4)
```

```
###Hypothesis 1
```

```
#Baseline Model
```

```
mod0 <- glmer(score ~ (1|item)+(1|person)+(1|school), family=binomial("logit"), data = data)
```

```
summary(mod0)
```

Generalized linear mixed model fit by maximum likelihood (Laplace Approximation) ['glmerMod']

Family: binomial ( logit )

Formula: score ~ (1 | item) + (1 | person) + (1 | school)

Data: data

| AIC    | BIC    | logLik  | deviance | df.resid |
|--------|--------|---------|----------|----------|
| 6427.0 | 6453.9 | -3209.5 | 6419.0   | 6203     |

Scaled residuals:

| Min     | 1Q      | Median  | 3Q     | Max    |
|---------|---------|---------|--------|--------|
| -6.7692 | -0.5916 | -0.2249 | 0.6210 | 7.8038 |

Random effects:

| Groups Name        | Variance | Std. Dev. |
|--------------------|----------|-----------|
| person (Intercept) | 0.3866   | 0.6217    |
| item (Intercept)   | 2.3422   | 1.5304    |
| school (Intercept) | 0.2466   | 0.4966    |

Number of obs: 6207, groups: person, 256; item, 64; school, 34

Fixed effects:

|             | Estimate | Std. Error | z value | Pr(> z ) |
|-------------|----------|------------|---------|----------|
| (Intercept) | -0.4401  | 0.2189     | -2.011  | 0.0443 * |

---  
Signif. codes: 0 '\*\*\*' 0.001 '\*\*' 0.01 '\*' 0.05 '.' 0.1 ' ' 1

```
#Model 1: Person variables as fixed effects
```

```
mod1 <- glmer(score ~ CK+RC+PS+ (1|item)+(1|person)+(1|school), family=binomial("logit"), data = data)
```

```
summary(mod1)
```

Generalized linear mixed model fit by maximum likelihood (Laplace Approximation) ['glmerMod']

Family: binomial ( logit )

Formula: score ~ CK + RC + PS + (1 | item) + (1 | person) + (1 | school)

Data: data

| AIC    | BIC    | logLik  | deviance | df.resid |
|--------|--------|---------|----------|----------|
| 6349.4 | 6396.6 | -3167.7 | 6335.4   | 6200     |

Scaled residuals:

| Min     | 1Q      | Median  | 3Q     | Max    |
|---------|---------|---------|--------|--------|
| -6.6236 | -0.5869 | -0.2198 | 0.6175 | 8.5475 |

Random effects:

| Groups Name        | Variance | Std. Dev. |
|--------------------|----------|-----------|
| person (Intercept) | 0.2485   | 0.4985    |
| item (Intercept)   | 2.3316   | 1.5270    |
| school (Intercept) | 0.0716   | 0.2676    |

Number of obs: 6207, groups: person, 256; item, 64; school, 34

Fixed effects:

|             | Estimate | Std. Error | z value | Pr(> z )     |
|-------------|----------|------------|---------|--------------|
| (Intercept) | -0.50263 | 0.20452    | -2.458  | 0.013986 *   |
| CK          | 0.17813  | 0.05123    | 3.477   | 0.000507 *** |
| RC          | 0.16600  | 0.04812    | 3.450   | 0.000561 *** |
| PS          | 0.31297  | 0.04742    | 6.600   | 4.1e-11 ***  |

---  
Signif. codes: 0 '\*\*\*' 0.001 '\*\*' 0.01 '\*' 0.05 '.' 0.1 ' ' 1

Correlation of Fixed Effects:

| (Intr) | CK     | RC     |        |
|--------|--------|--------|--------|
| CK     | 0.000  |        |        |
| RC     | -0.009 | -0.104 |        |
| PS     | -0.038 | -0.201 | -0.103 |

```
#Amount of explained variance of persons and school
```

```
1 - VarCorr(mod1)$person[1] /VarCorr(mod0)$person[1]
```

```
[1] 0.3571936
```

```
1 - VarCorr(mod1)$school[1] /VarCorr(mod0)$school[1]
```

```
[1] 0.7097046
```

```

###Hypothesis 2

#Model 2: Person variables are allowed to vary across items

mod2 <- glmer(score ~ CK+RC+PS+(1+CK+RC+PS|item)+(1|person)+(1|school),
              family=binomial("logit"), data = data, control=glmerControl(optimizer = "bobyqa"))

summary(mod2)
Generalized linear mixed model fit by maximum likelihood (Laplace Approximation) ['glmerMod']
Family: binomial (logit)
Formula: score ~ CK + RC + PS + (1 + CK + RC + PS | item) + (1 | person) + (1 | school)
Data: data
Control: glmerControl(optimizer = "bobyqa")

      AIC      BIC   logLik deviance df.resid
6347.4  6455.1 -3157.7  6315.4    6191

Scaled residuals:
   Min       1Q   Median       3Q      Max
-7.0601 -0.5818 -0.2236  0.6085  8.2135

Random effects:
Groups Name      Variance Std.Dev. Corr
person (Intercept) 0.24647  0.4965
item   (Intercept) 2.34390  1.5310
       CK           0.01484  0.1218  -0.63
       RC           0.03205  0.1790   0.50 -0.29
       PS           0.01717  0.1310   0.16  0.50  0.59
school (Intercept) 0.07408  0.2722
Number of obs: 6207, groups: person, 256; item, 64; school, 34

Fixed effects:
              Estimate Std. Error z value Pr(>|z|)
(Intercept) -0.49774    0.20554  -2.422 0.015451 *
CK           0.18649    0.05432   3.433 0.000597 ***
RC           0.16810    0.05503   3.055 0.002251 **
PS           0.31222    0.05189   6.017 1.78e-09 ***
---
Signif. codes:  0 '***' 0.001 '**' 0.01 '*' 0.05 '.' 0.1 ' ' 1

Correlation of Fixed Effects:
(Intr) CK      RC
CK -0.174
RC  0.180 -0.127
PS  0.006 -0.119  0.010

#Comparison of model 2 to the model without person variables varying across items

anova(mod2, mod1)
Data: data
Models:
mod1: score ~ CK + RC + PS + (1 | item) + (1 | person) + (1 | school)
mod2: score ~ CK + RC + PS + (1 + CK + RC + PS | item) + (1 | person) +
mod2: (1 | school)
      Df    AIC      BIC   logLik deviance  Chisq Chi Df Pr(>Chisq)
mod1  7 6349.4 6396.6 -3167.7  6335.4
mod2 16 6347.4 6455.1 -3157.7  6315.4 20.085    9  0.01739 *
---
Signif. codes:  0 '***' 0.001 '**' 0.01 '*' 0.05 '.' 0.1 ' ' 1

```

###Hypothesis 3

#Model 3: Interaction of intrinsic complexity (item indicator) and problem solving (person variable)

```
mod3 <- glmer(score ~ CK+RC+PS*compl+(1+CK+RC+PS|item)+(1|person)+(1|school),
  family=binomial("logit"), data = data, control=glmerControl(optimizer = "bobyqa"))
```

summary(mod3)

Generalized linear mixed model fit by maximum likelihood (Laplace Approximation) ['glmerMod']  
 Family: binomial ( logit )  
 Formula: score ~ CK + RC + PS \* compl + (1 + CK + RC + PS | item) + (1 | person) + (1 | school)  
 Data: data  
 Control: glmerControl(optimizer = "bobyqa")

| AIC    | BIC    | logLik  | deviance | df.resid |
|--------|--------|---------|----------|----------|
| 6342.2 | 6463.4 | -3153.1 | 6306.2   | 6189     |

Scaled residuals:

| Min     | 1Q      | Median  | 3Q     | Max    |
|---------|---------|---------|--------|--------|
| -7.2437 | -0.5823 | -0.2220 | 0.6079 | 7.5368 |

Random effects:

| Groups | Name        | Variance | Std. Dev. | Corr            |
|--------|-------------|----------|-----------|-----------------|
| person | (Intercept) | 0.24425  | 0.49421   |                 |
| item   | (Intercept) | 2.15057  | 1.46648   |                 |
|        | CK          | 0.00901  | 0.09492   | -0.33           |
|        | RC          | 0.03186  | 0.17849   | 0.52 -0.35      |
|        | PS          | 0.01168  | 0.10806   | 0.33 -0.40 0.75 |
| school | (Intercept) | 0.07287  | 0.26994   |                 |

Number of obs: 6207, groups: person, 256; item, 64; school, 34

Fixed effects:

|             | Estimate | Std. Error | z value | Pr(> z )     |
|-------------|----------|------------|---------|--------------|
| (Intercept) | -0.50268 | 0.19789    | -2.540  | 0.011078 *   |
| CK          | 0.17864  | 0.05330    | 3.352   | 0.000803 *** |
| RC          | 0.16781  | 0.05476    | 3.065   | 0.002180 **  |
| PS          | 0.32787  | 0.05118    | 6.407   | 1.49e-10 *** |
| compl       | -0.41796 | 0.21146    | -1.977  | 0.048090 *   |
| PS: compl   | 0.11180  | 0.04697    | 2.380   | 0.017303 *   |

Signif. codes: 0 '\*\*\*' 0.001 '\*\*' 0.01 '\*' 0.05 '.' 0.1 ' ' 1

Correlation of Fixed Effects:

|           | (Intr) | CK     | RC     | PS     | compl |
|-----------|--------|--------|--------|--------|-------|
| CK        | -0.070 |        |        |        |       |
| RC        | 0.188  | -0.130 |        |        |       |
| PS        | 0.037  | -0.220 | 0.014  |        |       |
| compl     | 0.010  | 0.049  | -0.028 | -0.038 |       |
| PS: compl | -0.025 | 0.005  | -0.010 | 0.150  | 0.033 |

#Model 4a: Interaction of word frequency (item indicator) and reading comprehension (person variable)

```
mod4a <- glmer(score ~ CK+RC*wordfrequ+PS+(1+RC+PS+CK|item)+(1|person)+(1|school),
  family=binomial("logit"), data = data, control=glmerControl(optimizer = "bobyqa"))
```

summary(mod4a)

Generalized linear mixed model fit by maximum likelihood (Laplace Approximation) ['glmerMod']  
 Family: binomial ( logit )  
 Formula: score ~ CK + RC \* wordfrequ + PS + (1 + RC + PS + CK | item) + (1 | person) + (1 | school)  
 Data: data  
 Control: glmerControl(optimizer = "bobyqa")

| AIC    | BIC    | logLik  | deviance | df.resid |
|--------|--------|---------|----------|----------|
| 6346.5 | 6467.7 | -3155.3 | 6310.5   | 6189     |

Scaled residuals:

| Min     | 1Q      | Median  | 3Q     | Max    |
|---------|---------|---------|--------|--------|
| -7.5567 | -0.5806 | -0.2243 | 0.6099 | 8.3288 |

Random effects:

| Groups | Name        | Variance | Std. Dev. | Corr             |
|--------|-------------|----------|-----------|------------------|
| person | (Intercept) | 0.24741  | 0.4974    |                  |
| item   | (Intercept) | 2.29310  | 1.5143    |                  |
|        | RC          | 0.03298  | 0.1816    | 0.51             |
|        | PS          | 0.01945  | 0.1395    | 0.40 0.63        |
|        | CK          | 0.01997  | 0.1413    | -0.78 -0.34 0.20 |
| school | (Intercept) | 0.07466  | 0.2732    |                  |

Number of obs: 6207, groups: person, 256; item, 64; school, 34

Fixed effects:

|               | Estimate | Std. Error | z value | Pr(> z )     |
|---------------|----------|------------|---------|--------------|
| (Intercept)   | -0.49845 | 0.20363    | -2.448  | 0.014372 *   |
| CK            | 0.18888  | 0.05500    | 3.434   | 0.000595 *** |
| RC            | 0.16846  | 0.05523    | 3.050   | 0.002285 **  |
| wordfrequ     | 0.43902  | 0.19144    | 2.293   | 0.021834 *   |
| PS            | 0.30824  | 0.05210    | 5.916   | 3.29e-09 *** |
| RC: wordfrequ | 0.01722  | 0.04214    | 0.409   | 0.682777     |

Signif. codes: 0 '\*\*\*' 0.001 '\*\*' 0.01 '\*' 0.05 '.' 0.1 ' ' 1

Correlation of Fixed Effects:

|              | (Intr) | CK     | RC     | wrdfreq | PS    |
|--------------|--------|--------|--------|---------|-------|
| CK           | -0.244 |        |        |         |       |
| RC           | 0.183  | -0.134 |        |         |       |
| wordfrequ    | -0.008 | 0.005  | 0.008  |         |       |
| PS           | 0.087  | -0.138 | 0.017  | -0.005  |       |
| RC: wordfreq | 0.009  | -0.023 | -0.046 | 0.193   | 0.029 |

#Model 4b: Interaction of readability (item indicator) and reading comprehension (person variable)

```
mod4b <- glmer(score ~ CK+RC*readab+PS+(1+CK+RC+PS|item)+(1|person)+(1|school),  
family=binomial("logit"), data = data, control=glmerControl(optimizer = "bobyqa"))
```

summary(mod4b)

Generalized linear mixed model fit by maximum likelihood (Laplace Approximation) ['glmerMod']

Family: binomial ( logit )

Formula: score ~ CK + RC \* readab + PS + (1 + CK + RC + PS | item) + (1 | person) + (1 | school)

Data: data

Control: glmerControl(optimizer = "bobyqa")

| AIC    | BIC    | logLik  | deviance | df.resid |
|--------|--------|---------|----------|----------|
| 6350.6 | 6471.8 | -3157.3 | 6314.6   | 6189     |

Scaled residuals:

| Min     | 1Q      | Median  | 3Q     | Max    |
|---------|---------|---------|--------|--------|
| -7.0661 | -0.5816 | -0.2227 | 0.6071 | 8.2448 |

Random effects:

| Groups | Name        | Variance | Std.Dev. | Corr           |
|--------|-------------|----------|----------|----------------|
| person | (Intercept) | 0.24609  | 0.4961   |                |
| item   | (Intercept) | 2.34535  | 1.5315   |                |
|        | CK          | 0.01537  | 0.1240   | -0.67          |
|        | RC          | 0.03056  | 0.1748   | 0.52 -0.25     |
|        | PS          | 0.01694  | 0.1301   | 0.14 0.50 0.65 |
| school | (Intercept) | 0.07392  | 0.2719   |                |

Number of obs: 6207, groups: person, 256; item, 64; school, 34

Fixed effects:

|             | Estimate | Std. Error | z value | Pr(> z )     |
|-------------|----------|------------|---------|--------------|
| (Intercept) | -0.49888 | 0.20562    | -2.426  | 0.015254 *   |
| CK          | 0.18682  | 0.05435    | 3.438   | 0.000587 *** |
| RC          | 0.16876  | 0.05472    | 3.084   | 0.002041 **  |
| readab      | 0.11983  | 0.19457    | 0.616   | 0.537996     |
| PS          | 0.31332  | 0.05182    | 6.047   | 1.48e-09 *** |
| RC: readab  | -0.01901 | 0.04092    | -0.465  | 0.642199     |

Signif. codes: 0 '\*\*\*' 0.001 '\*\*' 0.01 '\*' 0.05 '.' 0.1 ' ' 1

Correlation of Fixed Effects:

|            | (Intr) | CK     | RC     | readab | PS     |
|------------|--------|--------|--------|--------|--------|
| CK         |        | -0.186 |        |        |        |
| RC         | 0.184  |        | -0.119 |        |        |
| readab     | -0.010 | -0.003 | 0.001  |        |        |
| PS         | -0.001 | -0.119 | 0.018  | 0.012  |        |
| RC: readab | 0.002  | -0.011 | -0.037 | 0.228  | -0.022 |

#Model 4c: Interaction of number of words (item indicator) and reading comprehension (person variable)

```
mod4c <- glmer(score ~ CK+RC*nbwords+PS+(1+CK+RC+PS|item)+(1|person)+(1|school),  
family=binomial("logit"), data = data, control=glmerControl(optimizer = "bobyqa"))
```

summary(mod4c)

Generalized linear mixed model fit by maximum likelihood (Laplace Approximation) ['glmerMod']

Family: binomial ( logit )

Formula: score ~ CK + RC \* nbwords + PS + (1 + CK + RC + PS | item) + (1 | person) + (1 | school)

Data: data

Control: glmerControl(optimizer = "bobyqa")

| AIC    | BIC    | logLik  | deviance | df.resid |
|--------|--------|---------|----------|----------|
| 6349.8 | 6471.0 | -3156.9 | 6313.8   | 6189     |

Scaled residuals:

| Min     | 1Q      | Median  | 3Q     | Max    |
|---------|---------|---------|--------|--------|
| -6.9647 | -0.5815 | -0.2228 | 0.6082 | 8.2892 |

Random effects:

| Groups | Name        | Variance | Std.Dev. | Corr           |
|--------|-------------|----------|----------|----------------|
| person | (Intercept) | 0.24741  | 0.4974   |                |
| item   | (Intercept) | 2.30049  | 1.5167   |                |
|        | CK          | 0.01436  | 0.1198   | -0.62          |
|        | RC          | 0.03358  | 0.1832   | 0.50 -0.30     |
|        | PS          | 0.01729  | 0.1315   | 0.09 0.54 0.58 |
| school | (Intercept) | 0.07430  | 0.2726   |                |

Number of obs: 6207, groups: person, 256; item, 64; school, 34

Fixed effects:

|             | Estimate | Std. Error | z value | Pr(> z )     |
|-------------|----------|------------|---------|--------------|
| (Intercept) | -0.50038 | 0.20395    | -2.453  | 0.014149 *   |
| CK          | 0.18557  | 0.05428    | 3.419   | 0.000629 *** |
| RC          | 0.16935  | 0.05536    | 3.059   | 0.002222 **  |
| nbwords     | -0.20632 | 0.19483    | -1.059  | 0.289611     |
| PS          | 0.31382  | 0.05196    | 6.040   | 1.54e-09 *** |
| RC: nbwords | 0.01915  | 0.04634    | 0.413   | 0.679336     |

Signif. codes: 0 '\*\*\*' 0.001 '\*\*' 0.01 '\*' 0.05 '.' 0.1 ' ' 1

Correlation of Fixed Effects:

|             | (Intr) | CK     | RC     | nbwrds | PS    |
|-------------|--------|--------|--------|--------|-------|
| CK          |        | -0.166 |        |        |       |
| RC          | 0.182  |        | -0.128 |        |       |
| nbwords     | 0.010  | 0.018  | -0.008 |        |       |
| PS          | -0.016 | -0.117 | 0.012  | -0.029 |       |
| RC: nbwords | -0.010 | 0.007  | 0.048  | 0.190  | 0.000 |
